# Supplementary material for: Alternative splicing of flowering time gene FT is associated with halving of time to flowering in coconut
Source: PubMed Central journal article supplement (PMC7363896; doi:10.1038/s41598-020-68431-2), 2020-07-15
Supplement: 41598_2020_68431_MOESM1_ESM.pdf [file 41598_2020_68431_MOESM1_ESM.pdf]

**Alternative splicing of flowering time gene *FT* is associated with halving of time to flowering  
in coconut**

Wei Xia<sup>2\*</sup>, Rui Liu<sup>1\*</sup>, Jun Zhang<sup>1\*</sup>, Annaliese S. Mason<sup>3</sup>, Zhiying Li<sup>1</sup>, Shufang Gong<sup>1</sup>, Yazhu Zhong<sup>1</sup>,  
Yajing Dou<sup>1</sup>, Xiwei Sun<sup>1</sup>, Haikuo Fan<sup>1&</sup>, Yong Xiao<sup>1&</sup>

<sup>1</sup> Coconut Research Institute, Chinese Academy of Tropical Agricultural sciences, Wenchang, P.R.  
China

<sup>2</sup> College of tropical crops, Hainan University, Haikou, P.R. China

<sup>3</sup> Department of Plant Breeding, IFZ Research Centre for Biosystems, Land Use and Nutrition, Justus

Liebig University Giessen, Heinrich-Buff-Ring 26-32, 35392i Giessen, Germany

|                            |                                                                                    | Junction Length                      | Junction & Exon Length                                           |
|----------------------------|------------------------------------------------------------------------------------|--------------------------------------|------------------------------------------------------------------|
| Skipped exon               | 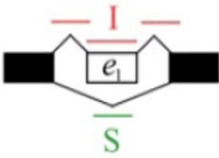  | $l_I : 2(j-r+1)$<br>$l_S : j-r+1$    | $l_I : e_1 - r + 1 + 2(j-r+1)$<br>$l_S : j-r+1$                  |
| Alternative 5' splice site |   | $l_I : 2(j-r+1)$<br>$l_S : j-r+1$    | $l_I : e_1 - r + 1 + 2(j-r+1)$<br>$l_S : j-r+1$                  |
| Alternative 3' splice site |   | $l_I : 2(j-r+1)$<br>$l_S : j-r+1$    | $l_I : e_1 - r + 1 + 2(j-r+1)$<br>$l_S : j-r+1$                  |
| Mutually exclusive exon    |   | $l_I : 2(j-r+1)$<br>$l_S : 2(j-r+1)$ | $l_I : e_1 - r + 1 + 2(j-r+1)$<br>$l_S : e_2 - r + 1 + 2(j-r+1)$ |
| Retained intron            |  | $l_I : 2(j-r+1)$<br>$l_S : j-r+1$    | $l_I : e_1 - r + 1 + 2(j-r+1)$<br>$l_S : j-r+1$                  |

$I$  : reads of the inclusion isoform       $S$  : reads of the skipping isoform  
 $j$  : junction length       $e_1, e_2$  : exon length       $r$  : read length  
 $l_I$  : effective length of the inclusion isoform  
 $l_S$  : effective length of the skipping isoform

**Supplementary figure 1 Relative abundance calculation of different isoforms produced by alternative splicing**
