# Supplementary material for: Alternative splicing of flowering time gene FT is associated with halving of time to flowering in coconut
Source: PubMed Central journal article supplement (PMC7363896; doi:10.1038/s41598-020-68431-2), 2020-07-15
Supplement: 41598_2020_68431_MOESM2_ESM.pdf [file 41598_2020_68431_MOESM2_ESM.pdf]

**Alternative splicing of flowering time gene *FT* is associated with halving of time to flowering  
in coconut**

Wei Xia<sup>2\*</sup>, Rui Liu<sup>1\*</sup>, Jun Zhang<sup>1\*</sup>, Annaliese S. Mason<sup>3</sup>, Zhiying Li<sup>1</sup>, Shufang Gong<sup>1</sup>, Yazhu Zhong<sup>1</sup>,  
Yajing Dou<sup>1</sup>, Xiwei Sun<sup>1</sup>, Haikuo Fan<sup>1&</sup>, Yong Xiao<sup>1&</sup>

<sup>1</sup> Coconut Research Institute, Chinese Academy of Tropical Agricultural sciences, Wenchang, P.R.  
China

<sup>2</sup> College of tropical crops, Hainan University, Haikou, P.R. China

<sup>3</sup> Department of Plant Breeding, IFZ Research Centre for Biosystems, Land Use and Nutrition, Justus  
Liebig University Giessen, Heinrich-Buff-Ring 26-32, 35392i Giessen, Germany

>CCG011565-dwarf-CDS

ATGGCTAGCTGCGTGGATCCCCTTGTGGTAGGGAGGGTCATAGGCGAGGTGGTGGACCTTTTTGTTCCAC  
CATGAGCATGTCTGTGAGCTACGGAACGAAGCATGTCAACAACGGCTGTGACGTGAAGCCGTCCATGGCTA  
TCAACCCTCCAAGTGTCCAGATCGCAGGCCGACGAGCCGACCTCTATACTCTGGTGATGACCGATCCGGATG  
CCCCAGTCCTAGTGACCCCACTATGAGGGAGTGGCTCCACTGGGTGGTGGTTAATATACCAGGTGGAACA  
GATACCTCCAAG-----GAGAGGAGGTGGTGGCGTACATGGGACCGCGGCCCGCGGTGGGGATCCACCGC  
TATGTCCTGGTGCTGTTCCAGCAGAAGTCAAGGTTCTTAACGGGGGCGGGGGTGGCTCTGCCTGCGTCTCG  
TGCCAACTTCAACACCCGCACCTTCGCCGCCCGGCATGACCTTGGTCTCCCCGTCGCTGCGGTCTACTTCAAT  
GCCCAGAAGGAGCCCGCCAACCGCCCGGTGA

> CCG011565-tall-CDS

ATGGCTAGCTGCGTGGATCCCCTTGTGGTAGGGAGGGTCATAGGCGAGGTGGTGGACCTTTTTGTTCCAC  
CATGAGCATGTCTGTGAGCTACGGAACGAAGCATGTCAACAACGGCTGTGACGTGAAGCCGTCCATGGCTA  
TCAACCCTCCAAGTGTCCAGATCGCAGGCCGACGAGCCGACCTCTATACTCTGGTGATGACCGATCCGGATG  
CCCCAGTCCTAGTGACCCCACTATGAGGGAGTGGCTCCACTGGGTGGTGGTTAATATACCAGGTGGAACA  
GATACCTCCAAGCGGCAGGAGAGGTGGTGGCGTACATGGGACCGCGGCCCGCGGTGGGGATCCAC  
CGCTATGTCCTGGTGCTGTTCCAGCAGAAGTCAAGGTTCTTAACGGGGGCGGGGGTGGCTCTGCCTGCGTC  
TCGTGCCAACTTCAACACCCGCACCTTCGCCGCCCGGCATGACCTTGGTCTCCCCGTCGCTGCGGTCTACTTC  
AATGCCCAGAAGGAGCCCGCCAACCGCCCGGGAA

**Supplementary file 2 Two transcripts sequences of *FT* gene (CCG011565.1)**
